CORRECTION

# Correction: The use and helpfulness of self-management strategies for depression: The experiences of patients

Rosa A. van Grieken, Mirjam J. van Tricht, Maarten W. J. Koeter<sup>†</sup>, Wim van den Brink, Aart H. Schene

<sup>†</sup> Deceased.

The title of [Table 2](#) is incorrect. Please see the corrected [Table 2](#) here.

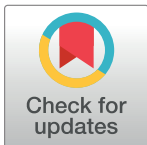

## OPEN ACCESS

**Citation:** van Grieken RA, van Tricht MJ, Koeter MWJ, van den Brink W, Schene AH (2018) Correction: The use and helpfulness of self-management strategies for depression: The experiences of patients. PLoS ONE 13(12): e0209109. <https://doi.org/10.1371/journal.pone.0209109>

**Published:** December 13, 2018

**Copyright:** © 2018 van Grieken et al. This is an open access article distributed under the terms of the [Creative Commons Attribution License](#), which permits unrestricted use, distribution, and reproduction in any medium, provided the original author and source are credited.

**Table 2. Fifty self-management strategies with corresponding percentages of use and perceived helpfulness.**

| Number | Strategy                                                                                     | Used |      | Very helpful (4 or 5) |                  |                  |
|--------|----------------------------------------------------------------------------------------------|------|------|-----------------------|------------------|------------------|
|        |                                                                                              | N    | (%)  | (N)                   | (%) <sup>1</sup> | (%) <sup>2</sup> |
| 1      | Identifying the cause of the depression                                                      | 174  | 90.2 | 68                    | 39.1             | 35.3             |
| 2      | Overcoming problems with concentration by creating to-do lists                               | 152  | 78.8 | 63                    | 41.4             | 32.6             |
| 3      | Finding strategies to create pleasurable distractions                                        | 175  | 90.7 | 53                    | 30.3             | 27.5             |
| 4      | Finding information about depression                                                         | 164  | 85   | 47                    | 28.7             | 24.4             |
| 5      | Completing treatment                                                                         | 167  | 86.5 | 101                   | 60.5             | 52.3             |
| 6      | Explaining depression to friends and family                                                  | 161  | 83.4 | 39                    | 24.2             | 20.2             |
| 7      | Discussing changes in role within the family/relationship                                    | 115  | 59.6 | 26                    | 22.6             | 13.5             |
| 8      | Meeting up with friends regularly                                                            | 147  | 76.2 | 43                    | 29.3             | 22.3             |
| 9      | Engaging in leisure activities                                                               | 175  | 90.7 | 45                    | 25.7             | 23.3             |
| 10     | Explaining depression to manager                                                             | 133  | 68.9 | 34                    | 25.6             | 17.6             |
| 11     | Engaging in moderate physical activity (cycling, walking etc.)                               | 161  | 83.4 | 61                    | 37.9             | 31.6             |
| 12     | Creating a timetable of activities                                                           | 132  | 68.4 | 54                    | 32.6             | 14               |
| 13     | Explaining depression to colleagues                                                          | 120  | 62.2 | 13                    | 10.8             | 7.6              |
| 14     | Taking every opportunity to tidy the house                                                   | 142  | 73.6 | 36                    | 25.4             | 18.7             |
| 15     | Setting realistic short term goals                                                           | 149  | 77.2 | 55                    | 36.9             | 28.5             |
| 16     | Making sure you have a good day/night rhythm                                                 | 163  | 84.5 | 68                    | 41.7             | 35.2             |
| 17     | Engaging in a structured form of meditation (e.g. yoga, mindfulness)                         | 119  | 61.7 | 39                    | 32.8             | 20.2             |
| 18     | Ensuring enough rest to avoid exhaustion through over-exertion                               | 156  | 80.8 | 77                    | 49.4             | 39.9             |
| 19     | Seeking contact with fellow sufferers                                                        | 103  | 53.4 | 34                    | 33               | 17.6             |
| 20     | Engaging in sports activities                                                                | 146  | 75.6 | 54                    | 37               | 20               |
| 21     | Keeping a diary                                                                              | 105  | 54.4 | 27                    | 25.7             | 14               |
| 22     | Observe alcohol intake                                                                       | 124  | 64.2 | 28                    | 22.6             | 14.5             |
| 23     | Being able to explain depression yourself                                                    | 88   | 45.6 | 15                    | 17               | 7.6              |
| 24     | Finding a different therapist when there is limited progress                                 | 111  | 57.5 | 45                    | 40.5             | 23.3             |
| 25     | Finding meaningful occupations (e.g. volunteering)                                           | 131  | 67.9 | 46                    | 35.1             | 23.8             |
| 26     | Becoming aware of daily routines                                                             | 147  | 76.2 | 41                    | 27.9             | 21.3             |
| 27     | Adjusting the discussion about depression allowing for what the partner/friend can cope with | 104  | 53.9 | 32                    | 31               | 16.7             |
| 28     | Ignoring the tiredness associated with depression                                            | 122  | 63.2 | 14                    | 11.5             | 7.3              |
| 29     | Discussing depression with those you trust in order to have support nearby                   | 143  | 74.1 | 47                    | 32.9             | 24.4             |
| 30     | Writing a web blog                                                                           | 21   | 10.9 | 2                     | 9.5              | 1.3              |
| 31     | Explaining depression to partner/family                                                      | 141  | 73.1 | 30                    | 21.3             | 15.6             |
| 32     | Making plans for the future                                                                  | 133  | 68.9 | 27                    | 20.3             | 14               |
| 33     | Changing the negative aspect of daily routines                                               | 132  | 68.4 | 31                    | 23.5             | 16.1             |
| 34     | Finding someone new when the relationship between therapist and patient is not compatible    | 97   | 50.3 | 41                    | 42.3             | 21.3             |
| 35     | Asking for support at work                                                                   | 94   | 48.7 | 24                    | 25.5             | 12.4             |
| 36     | Recalling positive memories                                                                  | 113  | 58.5 | 18                    | 15.5             | 9.1              |
| 37     | Gradually resuming responsibilities that had been taken over by others                       | 114  | 59.1 | 35                    | 30.7             | 18.1             |
| 38     | Leaving the house regularly                                                                  | 168  | 87   | 81                    | 48.2             | 41.9             |
| 39     | Exploring new hobbies                                                                        | 110  | 57   | 32                    | 29.1             | 16.6             |
| 40     | Restricting the time spent on worrying                                                       | 61   | 31.6 | 8                     | 13.1             | 4.1              |
| 41     | Finding out which activities are achievable                                                  | 134  | 69.4 | 47                    | 35.1             | 24.4             |
| 42     | Acknowledging that depression is a disease                                                   | 149  | 77.2 | 68                    | 45.5             | 35.1             |
| 43     | Using a positive mantra                                                                      | 133  | 68.9 | 38                    | 28.6             | 19.7             |
| 44     | Organizing that a therapist is accessible                                                    | 99   | 51.3 | 38                    | 38.4             | 19.7             |
| 45     | Searching out your family background                                                         | 104  | 53.9 | 27                    | 26               | 14               |
| 46     | Discussing information found about depression with therapist                                 | 89   | 46.1 | 18                    | 20.2             | 9.3              |

(Continued)

**Table 2.** (Continued)

| Number | Strategy                                                    | Used |      | Very helpful (4 or 5) |                  |                  |
|--------|-------------------------------------------------------------|------|------|-----------------------|------------------|------------------|
|        |                                                             | N    | (%)  | (N)                   | (%) <sup>1</sup> | (%) <sup>2</sup> |
| 47     | Making sure there is adequate support when using medication | 143  | 74.1 | 73                    | 51               | 37.8             |
| 48     | Meeting up with people who are not aware of the depression  | 102  | 52.8 | 11                    | 10.8             | 5.7              |
| 49     | Including partner/family in the treatment                   | 128  | 66.3 | 38                    | 29.7             | 19.7             |
| 50     | Healthy eating                                              | 158  | 81.9 | 45                    | 28.5             | 23.3             |

<sup>1</sup>% of participants who have used the strategy

<sup>2</sup>% of all 193 participants

<https://doi.org/10.1371/journal.pone.0209109.t001>

## Reference

1. van Grieken RA, van Tricht MJ, Koeter MWJ, van den Brink W, Schene AH (2018) The use and helpfulness of self-management strategies for depression: The experiences of patients. *PLoS ONE* 13(10): e0206262. <https://doi.org/10.1371/journal.pone.0206262> PMID: 30359444
